# Supplementary material for: Oligothienoacenes versus oligothiophenes: impact of ring fusion on the optical properties
Source: Royal Society of Chemistry journal article supplement (doi:10.1039/c0cp00410c), 2010-12-09
Supplement: c0cp00410.pdf [file c0cp00410.pdf]

## SUPPORTING INFORMATION FOR:

### **Oligothienoacenes versus oligothiophenes: Impact of ring fusion on the optical properties**

Juan Aragón,<sup>a</sup> Pedro M. Viruela,<sup>a</sup> Johannes Gierschner,<sup>a,b</sup> Enrique Ortí<sup>a</sup> and Begoña Milián-Medina<sup>a\*</sup>

<sup>a</sup> *Instituto de Ciencia Molecular, Universidad de Valencia, Valencia 46980 (Spain)*

<sup>b</sup> *Madrid Institute of Advanced Studies, IMDEA Nanoscience, Madrid (Spain)*

*E-mail: [b.milian.medina@uv.es](mailto:b.milian.medina@uv.es)*

## 1 Molecular structure

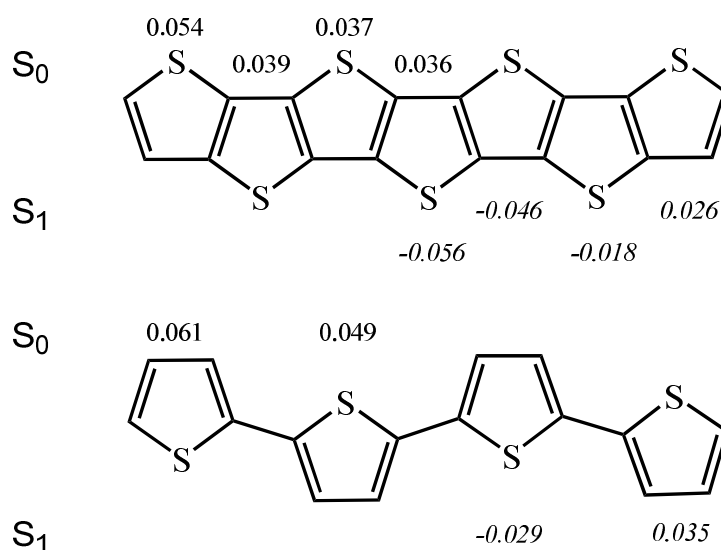

**Fig. S1** BLA values (Å) calculated for each thiophene ring of **7TA** and **4T** in the ground (S<sub>0</sub>) and first excited (S<sub>1</sub>) electronic states.

## 2 Optical properties

In order to rationalize the origin of the differences between the first transition energies in *n*TAs and *n*Ts, several tests have been carried out to separate substitution, geometrical and electronic effects.

### a) Substitution effect:

Geometry optimization at the B3LYP/6-31G\*\* level has been performed on **2T-(SH)<sub>2</sub>** (Fig. S2) and the vertical transition energy has been calculated on the optimized geometry. Our results indicate that substitution with sulphur atoms leads to a decrease of the optical bandgap with respect to **2T** (4.25 eV vs. 4.39 eV), contrary to what it is found for **3TA** (4.66 eV). Thus, the differences between *n*TAs and *n*Ts do not arise from a simple substituent effect.

### b) Geometrical effect:

In order to evaluate the impact of the geometry on the S<sub>0</sub> → S<sub>1</sub> transition energy, TD-DFT calculations have been carried out on **cis-2T**, **trans-2T**, **2T-SH** and **2T-(SH)<sub>2</sub>**, where the geometry of the backbone was kept frozen with bond lengths and angles from **3TA** (see Fig. S2). In all cases, a *decrease of the energy* with respect to the value for the optimized **2T** has been obtained, discarding the geometrical effect as the reason for the larger optical bandgap observed in **3TA**.

### c) Electronic effect:

The analysis of the energies of the HOMO and LUMO mono-electronic levels involved in the S<sub>0</sub> → S<sub>1</sub> transition of **cis-2T**, **trans-2T**, **2T-SH** and **2T-(SH)<sub>2</sub>** calculated at the

geometry of **3TA** shows the same trends for the HOMO – LUMO gap that those found for the calculated vertical transition energies (see Fig. S2). A closer inspection of the frontier orbitals of **2T** and **3TA** shows a destabilization of the LUMO in **3TA** due to an increase of the C-S antibonding interactions resulting from the participation of the sulphur atom of the bridge. The stabilization of the HOMO is ascribed to the additional electronic density introduced by the sulphur atoms in the bridge. In all, the HOMO – LUMO gap is increased resulting in a larger  $S_0 - S_1$  transition energy compared to **2T**.

In conclusion, the larger transition energies in **nTAs** in comparison to **nTs** arise from an electronic effect and are not related to a simple substituent or structural effect.

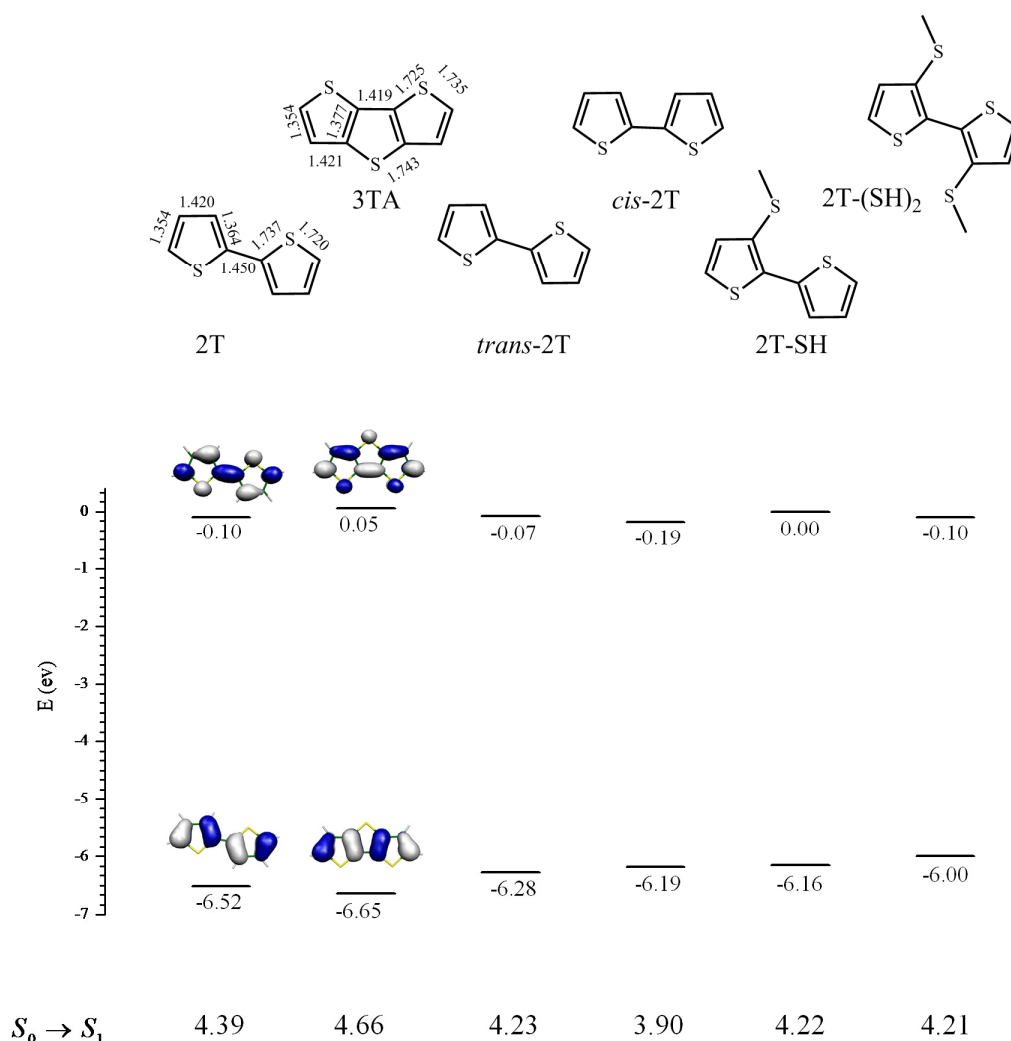

**Fig. S2** Optimized bond lengths (Å) (only for **2T** and **3TA**), orbital and  $S_0 \rightarrow S_1$  vertical excitation energies (eV) for **2T**, **3TA**, *trans*-**2T**, *cis*-**2T**, **2T-SH** and **2T-(SH)<sub>2</sub>**. The geometries of *trans*-**2T**, *cis*-**2T**, **2T-SH** and **2T-(SH)<sub>2</sub>** were kept frozen with bond lengths and angles from **3TA**.

### 3 Vibronic coupling

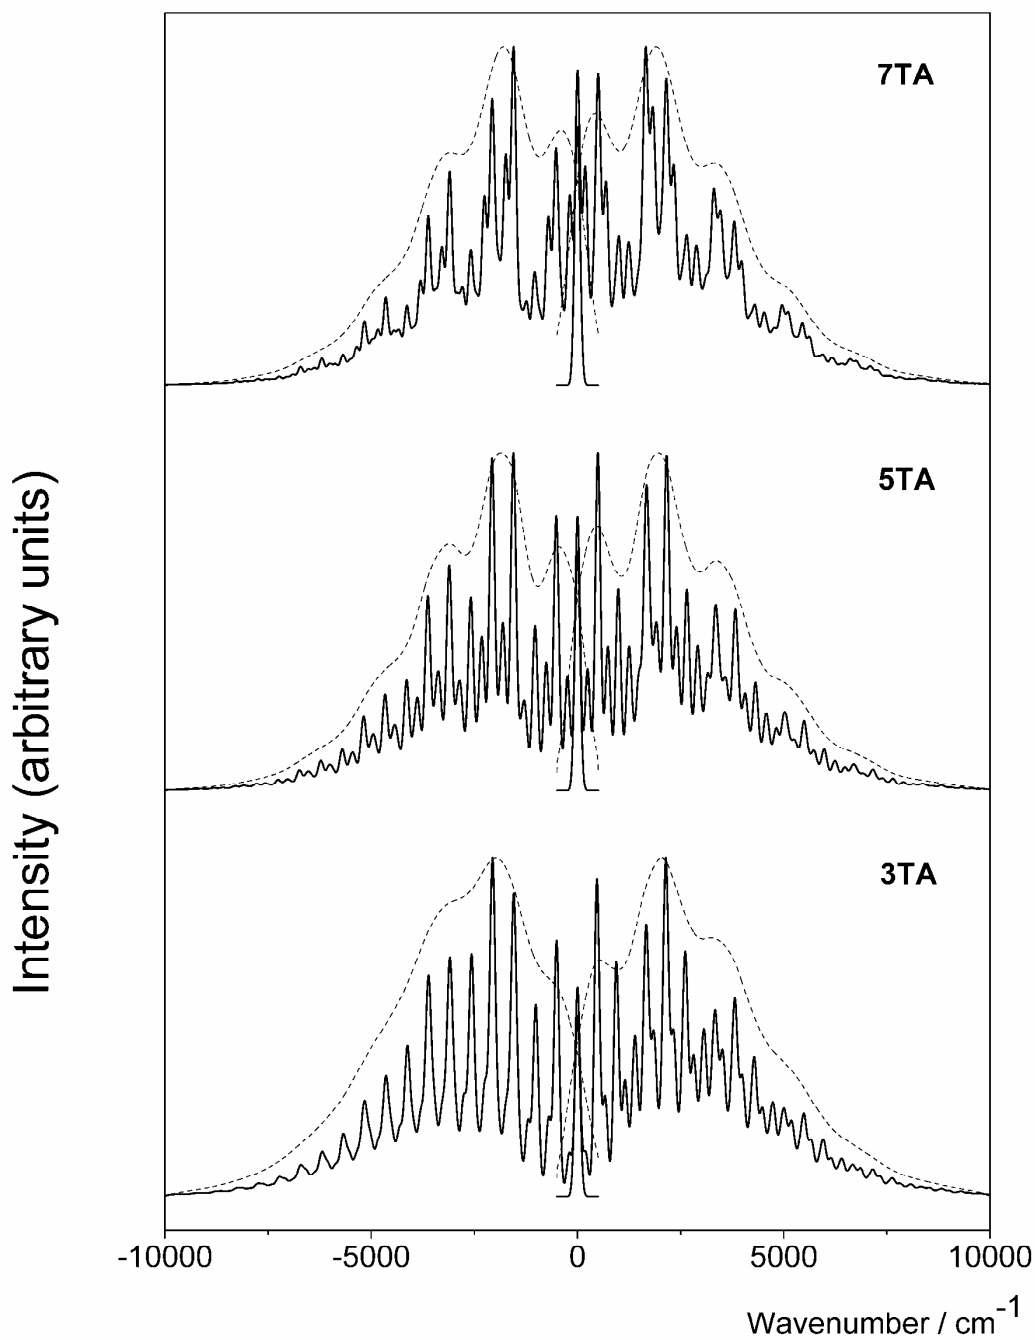

**Fig. S3** Simulated LT (solid line) and RT (dash line) spectra of absorption (right) and fluorescence (left) of **3TA**, **5TA** and **7TA** (from bottom to top). Inserted Gaussian half-width  $\gamma$  of  $150\text{ cm}^{-1}$  and  $1250\text{ cm}^{-1}$  at LT and RT for all compounds.

**Table S1.** Frequencies ( $\nu$  in  $\text{cm}^{-1}$ ) and HR factors ( $S_k$ ) of **2T** and **3T** for selected totally-symmetric normal modes ( $k$ ) involved in the  $S_0 \leftrightarrow S_1$  electronic transition in emission and excitation.

| $k$        | <b>2T</b> |       |            |       | <b>3T</b> |       |            |       | <b>4T</b> |       |            |       |
|------------|-----------|-------|------------|-------|-----------|-------|------------|-------|-----------|-------|------------|-------|
|            | Emission  |       | Excitation |       | Emission  |       | Excitation |       | Emission  |       | Excitation |       |
|            | $\nu_0^a$ | $S_k$ | $\nu_1^a$  | $S_k$ | $\nu_0^a$ | $S_k$ | $\nu_1^a$  | $S_k$ | $\nu_0^a$ | $S_k$ | $\nu_1^a$  | $S_k$ |
| <b>I</b>   | 304       | 0.15  | 296        | 0.14  | 216       | 0.45  | 215        | 0.42  | 166       | 0.60  | 167        | 0.64  |
| <b>II</b>  | 395       | 0.36  | 395        | 0.37  | 352       | 0.29  | 358        | 0.31  | 334       | 0.28  | 344        | 0.25  |
| <b>III</b> | 712       | 0.83  | 688        | 0.64  | 729       | 0.45  | 711        | 0.42  | 735       | 0.30  | 721        | 0.33  |
| <b>IV</b>  | 1575      | 1.19  | 1693       | 0.89  | 1587      | 1.08  | 1673       | 0.86  | 1585      | 0.92  | 1666       | 1.03  |
| <b>V</b>   | 1690      | 0.08  | 1552       | 0.42  | 1670      | 0.05  | 1599       | 0.28  | 1660      | 0.18  | 1635       | 0.04  |

<sup>a</sup>  $\nu_0$  and  $\nu_1$  indicate the frequencies of the ground and first excited states, respectively

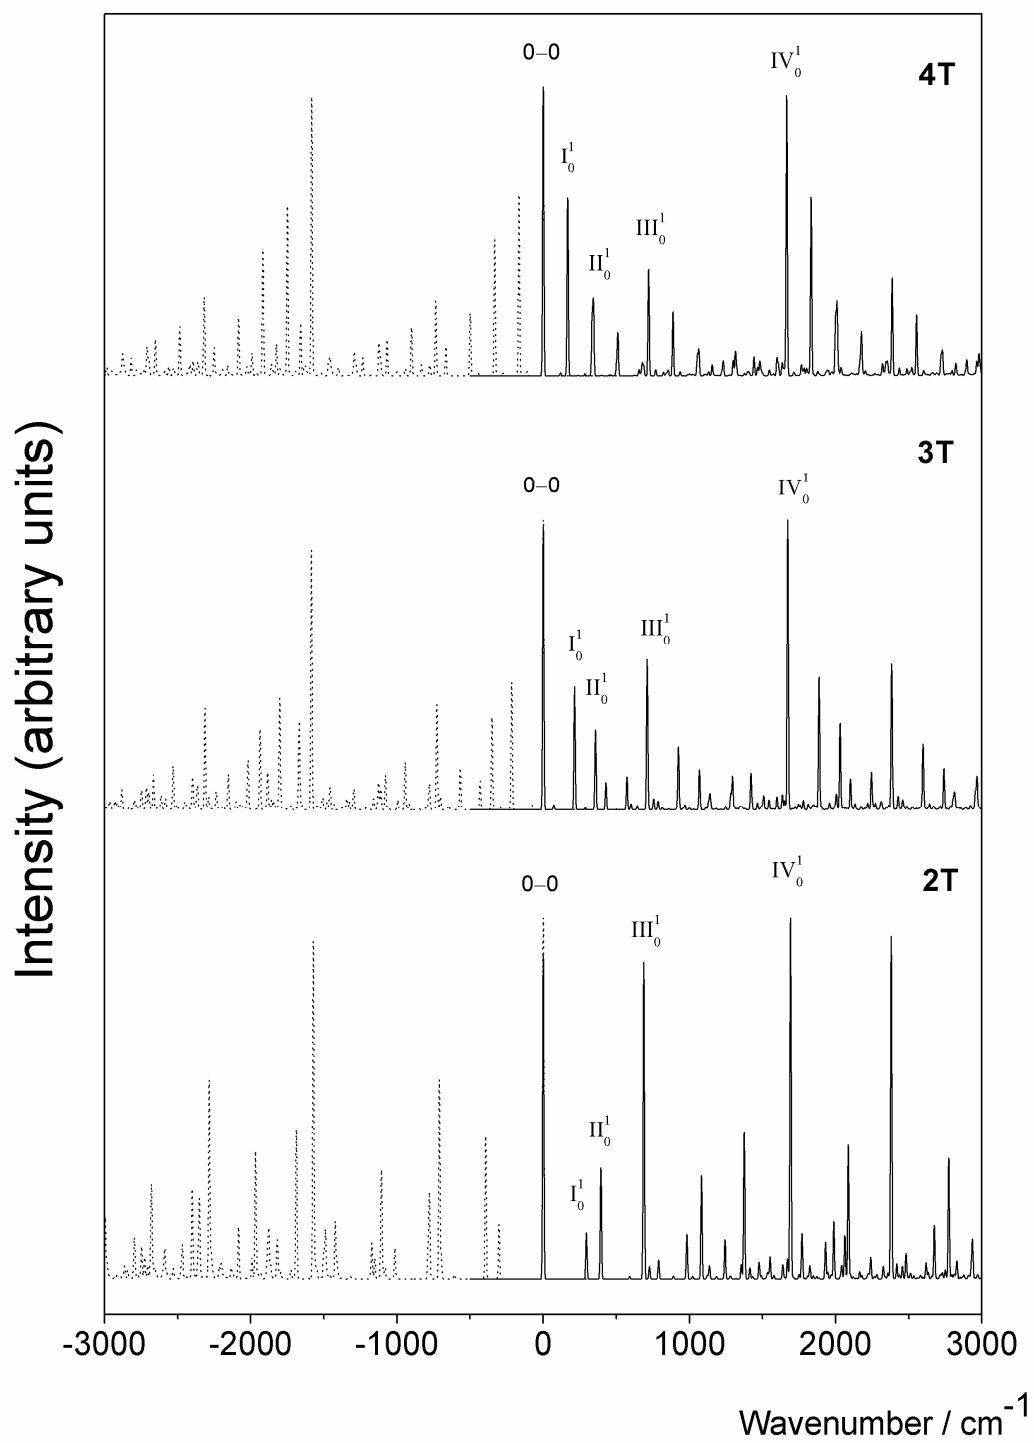

**Figure S4.** Simulated stick spectra of absorption (solid line) and fluorescence (dotted line) of **2T**, **3T** and **4T** (from bottom to top). Inserted Gaussian half-width  $\gamma$  of  $10 \text{ cm}^{-1}$  for all compounds.
